# Supplementary material for: Rational design of thioamide peptides as selective inhibitors of cysteine protease cathepsin L
Source: Chem Sci. 2021 Jul 19;12(32):10825–35. doi: 10.1039/d1sc00785h (PMC8901119; doi:10.1039/d1sc00785h)
Supplement: SC-012-D1SC00785H-s001 [file SC-012-D1SC00785H-s001.xlsx]

## Sheet: Key
	File Name	File Format	Content
	Fig2_Table 1	Prism	(1) Normalized cleavage data with cysteine cathepsin proteases (Cts L, Cts V, Cts K , Cts S, and Cts B). (2) Initial rate analysis of peptide cleavage by cysteine cathepsin proteases. Rates and standard errors are calculated by fitting to linear regression function in Prism.
	Fig3	Prism	Cts L Inhibition Analysis with RS1A peptide (Michaelis-Menten Fit, Lineweaver-Burke Plot; mixed inhibition fit)
	Fig4	Prism	Inhibition of Cts L Activity by RS1A peptide and the positive control (SID 26681509). The file includes the raw fluorescence readings at 505 nm, Cts L activity (% Control) & IC50 fit, and stability data of R1A and RS1A peptides in HepG2 (% Intact peptide and errors). For raw stability data, see file "SI_FigS26 Analysis_Peptide Stability in HepG2".
	ESI_FigS2-S6_Fluorescence	Prism	Raw fluorescence plots from steady state proteases with 5 cathepsin proteases (Cts L, Cts V, Cts K, Cts B, and Cts S) and all of the peptides investigated in this study. The fluorescence was monitored as a function of time at 390 nm with an excitation wavelength of 325 nm. Three independent trials were performed for each assay to ensure reproducibility. The data from the three trials were average…
	ESI_FigS13-19_Cts L Inhibition_FRAMC	Prism	Fluorescence plots from Cts L inhibition assays of peptides with Z-FR-AMC substrate (SI Figures S13-19). The file also includes Michaelis-Menten analysis, Lineweaver-Burk Analysis as shown in Tables S12-18, and inhibition analysis (as shown in Main Text Table 2 and Table S24) .
	ESI_FigS21_Cts V Inhibition_LRAMC	Prism	Fluorescence plots from Cts V inhibition assays of RS1A peptide with Z-LR-AMC substrate (SI Figure S21). The file also includes Michaelis-Menten analysis, Lineweaver-Burk Analysis as shown in Table S19, and inhibition analysis (as shown in Table S24) .
	ESI_FigS22_Cts K Inhibition_LRAMC	Prism	Fluorescence plots from Cts K inhibition assays of RS1A peptide with Z-LR-AMC substrate (SI Figure S22). The file also includes Michaelis-Menten analysis, Lineweaver-Burk Analysis as shown in Table S20, and inhibition analysis (as shown in Table S24) .
	ESI_FigS23_Cts S Inhibition_LRAMC	Prism	Fluorescence plots from Cts S inhibition assays of RS1A peptide with Z-LR-AMC substrate (SI Figure S23). The file also includes Michaelis-Menten analysis, Lineweaver-Burk Analysis as shown in Table S21, and inhibition analysis (as shown in Table S24) .
	ESI_FigS24_Cts B Inhibition_RRAMC	Prism	Fluorescence plots from Cts B inhibition assays of RS1A peptide with Z-RR-AMC substrate (SI Figure S24). The file also includes Michaelis-Menten analysis, Lineweaver-Burk Analysis as shown in Table S22, and inhibition analysis (as shown in Table S24) .
	ESI_FigS26_Analysis_Peptide Stability in HepG2	Excel	Analysis of raw data from stability assays of 20 μM R1A Peptide (μHLFRAμ) and RS1A Peptide (μHLFRSAμ) in 0.05 mg/mL HepG2 Whole Cell Lysate. To calculate the percent intact peptide for each sample, the average ratio of intact peptide to internal standard from HPLC traces (representative traces shown in Fig S26) was compared to that ratio at t = 0. For each time point, the experiment was done in t…
	ESI_FigS27_CtsL_R3A	PDB	Structural model of Cts L with R3A peptide (μHLFRAAAμ) from FlexPepDock, MutateResidue, and FastRelax protocol in Rosetta.
	ESI_FigS28_CtsV_R3A	PDB	Structural model of Cts V with R3A peptide (μHLFRAAAμ) from FlexPepDock, MutateResidue, and FastRelax protocol in Rosetta.
	ESI_FigS29_CtsK_R3A	PDB	Structural model of Cts K with R3A peptide (μHLFRAAAμ) from FlexPepDock, MutateResidue, and FastRelax protocol in Rosetta.
	ESI_FigS30_CtsS_R3A	PDB	Structural model of Cts S with R3A peptide (μHLFRAAAμ) from FlexPepDock, MutateResidue, and FastRelax protocol in Rosetta.
	ESI_FigS31_CtsB_R3A	PDB	Structural model of Cts B with R3A peptide (μHLFRAAAμ) from FlexPepDock, MutateResidue, and FastRelax protocol in Rosetta.
	ESI_FigS32_CtsL_Rs3A	PDB	Structural model of Cts L with RS3A peptide (µHLFRSAAAµ) from FlexPepDock, MutateResidue, FastRelax, thioamide Patch, and local relax protocol in Rosetta.
	ESI_FigS33_CtsV_Rs3A	PDB	Structural model of Cts V with RS3A peptide (µHLFRSAAAµ) from FlexPepDock, MutateResidue, FastRelax, thioamide Patch, and local relax protocol in Rosetta.
	ESI_FigS34_CtsK_Rs3A	PDB	Structural model of Cts K with RS3A peptide (µHLFRSAAAµ) from FlexPepDock, MutateResidue, FastRelax, thioamide Patch, and local relax protocol in Rosetta.
	ESI_FigS35_CtsS_Rs3A	PDB	Structural model of Cts S with RS3A peptide (µHLFRSAAAµ) from FlexPepDock, MutateResidue, FastRelax, thioamide Patch, and local relax protocol in Rosetta.
	ESI_FigS36_CtsB_Rs3A	PDB	Structural model of Cts B with RS3A peptide (µHLFRSAAAµ) from FlexPepDock, MutateResidue, FastRelax, thioamide Patch, and local relax protocol in Rosetta.
	ESI_FigS37_CtsL_R1A	PDB	Structural model of Cts L with R1A peptide (μHLFRAμ) from FlexPepDock, MutateResidue, and FastRelax protocol in Rosetta.
	ESI_FigS38_CtsV_R1A	PDB	Structural model of Cts V with R1A peptide (μHLFRAμ) from FlexPepDock, MutateResidue, and FastRelax protocol in Rosetta.
	ESI_FigS39_CtsK_R1A	PDB	Structural model of Cts K with R1A peptide (μHLFRAμ) from FlexPepDock, MutateResidue, and FastRelax protocol in Rosetta.
	ESI_FigS40_CtsS_R1A	PDB	Structural model of Cts S with R1A peptide (μHLFRAμ) from FlexPepDock, MutateResidue, and FastRelax protocol in Rosetta.
	ESI_FigS41_CtsB_R1A	PDB	Structural model of Cts B with R1A peptide (μHLFRAAAμ) from FlexPepDock, MutateResidue, and FastRelax protocol in Rosetta.
	ESI_FigS42_CtsL_Rs1A	PDB	Structural model of Cts L with RS1A peptide (µHLFRSAµ) from FlexPepDock, MutateResidue, FastRelax, thioamide Patch, and local relax protocol in Rosetta.
	ESI_FigS43_CtsV_Rs1A	PDB	Structural model of Cts V with RS1A peptide (µHLFRSAµ) from FlexPepDock, MutateResidue, FastRelax, thioamide Patch, and local relax protocol in Rosetta.
	ESI_FigS44_CtsK_Rs1A	PDB	Structural model of Cts K with RS1A peptide (µHLFRSAµ) from FlexPepDock, MutateResidue, FastRelax, thioamide Patch, and local relax protocol in Rosetta.
	ESI_FigS45_CtsS_Rs1A	PDB	Structural model of Cts S with RS1A peptide (µHLFRSAµ) from FlexPepDock, MutateResidue, FastRelax, thioamide Patch, and local relax protocol in Rosetta.
	ESI_FigS46_CtsB_Rs1A	PDB	Structural model of Cts B with RS1A peptide (µHLFRSAµ) from FlexPepDock, MutateResidue, FastRelax, thioamide Patch, and local relax protocol in Rosetta.
	ESI_FigS47_MDA-MB-231 Cells_Cts L Inhibition_Raw Data	Excel	The raw data output from ImageJ-Fiji and all relevant information (e.g. threshold, area, integrated density, etc.) is included in this spreadsheet. Cell fluorescence from raw images from Cts L Inhibition assays (using Magic Red) in MDA-MB-231 cells was analyzed using ImageJ-Fiji. The color images were first split into RGB channels; all Red-channel images were then quantified for integrated fluore…
	ESI_FigS47_MDA-MB-231 Cells_Cts L Inhibition	Prism	This file includes the final analysis for In vitro inhibition of Cathepsin L activity with DMSO control, positive controls (20 µM SID 26681509 and 10 µM SID E-64), and our peptide RS1A in human breast cancer MDA-MB-231 cells. The file also includes representative images (bright field images and corresponding fluorescence images) of unstained MDA-MB-231 cells and cells stained with ICT’s cathepsin…
