# Supplementary material for: Rational design of thioamide peptides as selective inhibitors of cysteine protease cathepsin L
Source: Chem Sci. 2021 Jul 19;12(32):10825–35. doi: 10.1039/d1sc00785h (PMC8901119; doi:10.1039/d1sc00785h)
Supplement: SC-012-D1SC00785H-s007 [file SC-012-D1SC00785H-s007.xlsx]

## Sheet: uHLFRAu Stability
HAP05030 (t = 0 min)					HAP05026 (t = 5 mins)					HAP05026 (t = 10 mins)					HAP05026 (t = 15 mins)					HAP05026 (t = 20 mins)					HAP05026 (t = 30 mins)
Fmoc-MCM std	204.3	199.6	189.7		Fmoc-MCM std	193.5	197	191		Fmoc-MCM std	197	182.4	188.3		Fmoc-MCM std	190.6	205.3	174.7		Fmoc-MCM std	190.5	200.6	197.2		Fmoc-MCM std	192.6	198.5	196.8
Intact Peptide	1641.1	1566.1	1486.1		Intact Peptide	794.8	688.5	629.4		Intact Peptide	526.6	549.1	535		Intact Peptide	508.6	486.1	477.3		Intact Peptide	392.5	301.3	311.2		Intact Peptide	112.6	94.9	113.8
	8.03279	7.84619	7.83395			4.10749	3.49492	3.29529			2.6731	3.01042	2.84121			2.66842	2.36775	2.73211			2.06037	1.50199	1.57809			0.584631	0.478086	0.578252
100% intact	7.90431	0.111438			% intact	0.459568	0.423236			% intact	0.359497	0.16866			% intact	0.327597	0.194598			% intact	0.216779	0.302809			% intact	0.0692014	0.0597578
Time (mins)	% intact peptide	Error
0	1	0.111438
5	0.459568	0.0539356
10	0.359497	0.0214092
15	0.327597	0.0246844
20	0.216779	0.0383525
30	0.0692014	0.00757391
Experimenter: Hoang Anh Phan (Petersson Lab)

## Sheet: uHLFRsAu Stability
HAP05022/30 (t = 0 hour)					HAP05022 (t = 2 hours)					HAP05022 (t = 6 hours)					HAP05022 (t = 8 hours)					HAP05022 (t = 10 hours)					HAP05022 (t = 24 hours)
Fmoc-MCM std	209.7	189.1	175.5		Fmoc-MCM std	190	195.6	193.8		Fmoc-MCM std	212.5	198.2	210		Fmoc-MCM std	194	194.6	188.9		Fmoc-MCM std	196.9	195	192.4		Fmoc-MCM std	181.2	185	196.4
Intact Peptide	1826.8	1683.3	1570.6		Intact Peptide	1484.1	1495.2	1446.2		Intact Peptide	1444.1	1390.3	1319.7		Intact Peptide	1444.6	1339.6	1341.4		Intact Peptide	1469.6	1382.9	1281.7		Intact Peptide	1081.1	1049.3	912.4
	8.71149	8.90164	8.94929			7.81105	7.64417	7.46233			6.79576	7.01463	6.28429			7.44639	6.88386	7.10111			7.46369	7.09179	6.66164			5.96634	5.67189	4.64562
100% intact	8.85414	0.125812			% intact	0.862781	0.174414			% intact	0.756508	0.374815			% intact	0.80683	0.283682			% intact	0.798765	0.401375			% intact	0.613041	0.693327
Time (hours)	% intact peptide	Error
0	1	0.125812
2	0.862781	0.023202
6	0.756508	0.0424849
8	0.80683	0.0322023
10	0.798765	0.0454932
24	0.613041	0.0784292
Experimenter: Hoang Anh Phan (Petersson Lab)
