# Supplementary material for: Rational design of thioamide peptides as selective inhibitors of cysteine protease cathepsin L
Source: Chem Sci. 2021 Jul 19;12(32):10825–35. doi: 10.1039/d1sc00785h (PMC8901119; doi:10.1039/d1sc00785h)
Supplement: SC-012-D1SC00785H-s030 [file SC-012-D1SC00785H-s030.xlsx]

## Sheet: Biological Replicate 1
Condition		Label	Area	Mean	Min	Max	Integrated Density	Raw Integrated Density	MinThr	MaxThr		Average Integrated Density
0.5% DMSO (no MR)	1	1_DMSO_No MR_20X_F.JPG (red)	19	39.947	38	70	759	759	38	255		579.667
	2	2_DMSO_No MR_20X_F.JPG (red)	24	38.333	38	44	920	920	38	255
	3	3_DMSO_No MR_20X_F.JPG (red)	1	60	60	60	60	60	38	255
0.5% DMSO	1	1_DMSO_20X_F_a.JPG (red)	613887	48.73	38	255	29914695	29914695	38	255		3.95273e+07
	2	2_DMSO_20X_F_b.JPG (red)	841896	52.466	38	255	44170625	44170625	38	255
	3	3_DMSO_20X_F.JPG (red)	887231	50.152	38	255	44496683	44496683	38	255
20 μM SID 26681509	1	1_20 uM SID_20X_F.JPG (red)	702417	52.815	38	255	37097859	37097859	38	255		33547596
	2	2_20 uM SID_20X_F.JPG (red)	621172	53.952	38	255	33513526	33513526	38	255
	3	3_20 uM SID_20X_F.JPG (red)	545018	55.102	38	255	30031403	30031403	38	255
10 μM E-64	1	1_10 uM E64_20X_F.JPG (red)	564446	51.976	38	255	29337364	29337364	38	255		2.81891e+07
	2	2_10 uM E64_20X_F.JPG (red)	519420	51.245	38	255	26617796	26617796	38	255
	3	3_10 uM E64_20X_F.JPG (red)	524009	54.602	38	255	28612153	28612153	38	255
50 μM RS1A	1	1_50 uM Rs1A_20X_F.JPG (red)	546727	51.952	38	255	28403665	28403665	38	255		2.07552e+07
	2	2_50 uM Rs1A_20X_F.JPG (red)	442124	54.858	38	255	24253904	24253904	38	255
	3	3_50 uM Rs1A_20X_F.JPG (red)	169032	56.841	38	251	9607919	9607919	38	255
Cathepsin Activity (%)		DMSO (no MR)
		DMSO	0.75681	1.11747	1.12572
		20 uM SID	0.938537	0.847857	0.759763
		10 uM E64	0.742204	0.673402	0.723857
		50 uM RS1A	0.718583	0.613598	0.24307
	Percent	DMSO	75.681	111.747	112.572
		20 uM SID	93.8537	84.7857	75.9763
		10 uM E64	74.2204	67.3402	72.3857
		50 uM RS1A	71.8583	61.3598	24.307
Experimenter: Hoang Anh Phan (Petersson Lab)

## Sheet: Biological Replicate 2
Condition		Label	Area	Mean	Min	Max	Integrated Density	Raw Integrated Density	MinThr	MaxThr		Average Integrated Density
0.5% DMSO (no MR)	1	1_DMSO_No MR_20X_F_2.JPG (red)	0	0	0	0	0	0	30	255		0
	2	2_DMSO_No MR_20X_F_2.JPG (red)	0	0	0	0	0	0	30	255
	3	3_DMSO_No MR_20X_F_2.JPG (red)	0	0	0	0	0	0	30	255
0.5% DMSO	1	1_DMSO_20X_F_2.JPG (red)	75745	41.89	31	132	3172948	3172948	30	255		4483844
	2	2_DMSO_20X_F_2.JPG (red)	128676	40.932	31	109	5266963	5266963	30	255
	3	3_DMSO_20X_F_2.JPG (red)	126663	39.567	30	163	5011621	5011621	30	255
20 μM SID 26681509	1	1_20 uM SID_20X_F_2.JPG (red)	79609	40.205	31	118	3200719	3200719	30	255		2.97675e+06
	2	2_20 uM SID_20X_F_2.JPG (red)	73110	38.46	31	105	2811843	2811843	30	255
	3	3_20 uM SID_20X_F_2.JPG (red)	72765	40.097	31	112	2917678	2917678	30	255
10 μM E-64	1	1_10 uM E64_20X_F_2.JPG (red)	66459	38.403	31	84	2552255	2552255	30	255		2.93221e+06
	2	2_10 uM E64_20X_F_2.JPG (red)	52549	41.979	31	94	2205932	2205932	30	255
	3	3_10 uM E64_20X_F.JPG (red)	95762	42.172	30	133	4038432	4038432	30	255
50 μM RS1A	1	1_50 uM Rs1A_20X_F_2.JPG (red)	49390	40.289	31	123	1989875	1989875	30	255		2393384
	2	2_50 uM Rs1A_20X_F_2.JPG (red)	52699	38.855	31	105	2047610	2047610	30	255
	3	3_50 uM Rs1A_20X_F_2.JPG (red)	79517	39.522	31	100	3142667	3142667	30	255
Cathepsin Activity (%)		DMSO (no MR)
		DMSO	0.70764	1.17465	1.11771
		20 uM SID	0.713834	0.627105	0.650709
		10 uM E64	0.569211	0.491973	0.900663
		50 uM RS1A	0.443788	0.456664	0.700887
	Percent	DMSO	70.764	117.465	111.771
		20 uM SID	71.3834	62.7105	65.0709
		10 uM E64	56.9211	49.1973	90.0663
		50 uM RS1A	44.3788	45.6664	70.0887
Experimenter: Hoang Anh Phan (Petersson Lab)
